# Supplementary material for: Chain-like NiCo2O4 nanowires with different exposed reactive planes for high-performance supercapacitors
Source: Royal Society of Chemistry journal article supplement (doi:10.1039/c3ta11361b), 2013-01-01
Supplement: c3ta11361b.pdf [file c3ta11361b.pdf]

## Supporting Information

### Chain-like NiCo<sub>2</sub>O<sub>4</sub> nanowires with exposed different reactive planes for high-performance supercapacitors

Rujia Zou,<sup>a</sup> Kaibing Xu,<sup>a</sup> Teng Wang,<sup>a</sup> Guanjie He,<sup>a</sup> Qian Liu,<sup>a</sup> Xijian Liu,<sup>a</sup> Zhenyu Zhang<sup>b</sup> and Junqing Hu<sup>\*a</sup>

<sup>a</sup>State Key Laboratory for Modification of Chemical Fibers and Polymer Materials, College of Materials Science and Engineering, Donghua University, Shanghai 201620, China

E-mail: [hu.junqing@dhu.edu.cn](mailto:hu.junqing@dhu.edu.cn)

<sup>b</sup>Center of Super-Diamond and Advanced Films (COSDAF), Department of Physics and Materials Science, City University of Hong Kong, Hong Kong

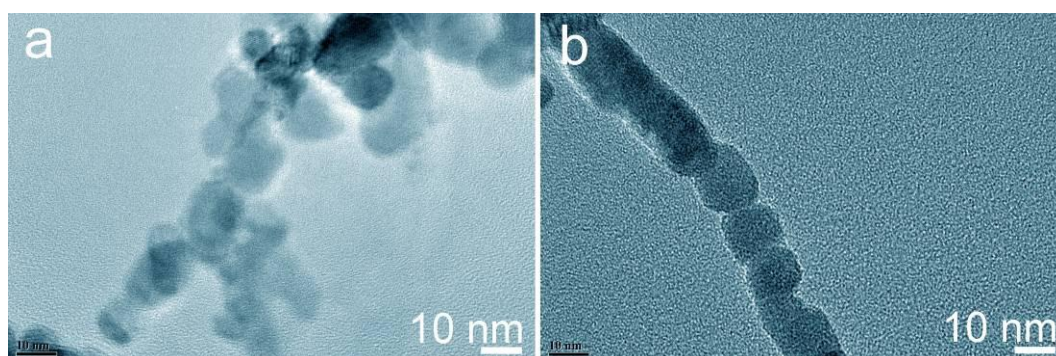

**Figure S1.** TEM images of the chain-like NiCo<sub>2</sub>O<sub>4</sub> nanowires after cycling for 3000 cycles at a scan rate of 50 mV s<sup>-1</sup>.

### **I. The synthesis of 3D NiCo<sub>2</sub>O<sub>4</sub> micro-sphere constructed with radial mesoporous nanowires for supercapacitors**

In a typical synthesis, 1 mmol of NiCl<sub>2</sub>·6H<sub>2</sub>O, 2 mmol of CoCl<sub>2</sub>·6H<sub>2</sub>O and 4 mmol of urea are dissolved into a 50 mL of H<sub>2</sub>O at room temperature to form a clear pink solution under vigorous magnetic stirring. After stirring for 30 min, as-obtained solution was transferred into a 60 mL polytetrafluoroethylene (PTFE) (Teflon)-lined autoclave and maintained at 100 °C for 24 h in an electric oven. After being cooled to room temperature naturally, the precipitate was collected and washed with deionized water and ethanol for several times by centrifugation, then dried at 60 °C overnight. In order to get crystallized mesoporous NiCo<sub>2</sub>O<sub>4</sub> nanowire, the as-grown precursor NiCo<sub>2</sub>O<sub>4</sub> micro-sphere were annealed in air at 300 °C for 120 min, temperature rising with a ramping rate of 1 °C min<sup>-1</sup>.

Figure S2a is the SEM image of as directly collected 3D micro-sphere NiCo<sub>2</sub>O<sub>4</sub> after calcination at 300 °C for 2 h, from which the diameter of the micro-spheres are estimated to be ~ 5 μm averagely. The micro-spheres are uniformly constructed with radial ultrafine nanowires, appearing like a dandelion. The inset in Figure S2a indicates that the NiCo<sub>2</sub>O<sub>4</sub> nanowires are continuous with a roughness on the surface. Interestingly, the magnified images clearly show that mesopores are uniformly distributed throughout the whole surface of nanowires. The TEM image of NiCo<sub>2</sub>O<sub>4</sub> nanowires after calcination is given in Figure S2b, which remarkably suggesting that the nanowires are mesopores NiCo<sub>2</sub>O<sub>4</sub> nanowires with diameter ranging from 80-150 nm. The BET surface area of the mesoporous NiCo<sub>2</sub>O<sub>4</sub> nanowires is determined by the N<sub>2</sub> adsorption/desorption measurement to be as high as 121.5 m<sup>2</sup>/g.

The specific capacitances in mesopores NiCo<sub>2</sub>O<sub>4</sub> nanowires were calculated by CD at different current densities, as shown in Figure S2c. The specific capacitance of the material is evaluated to be 865, 788, 714, 669, 649, and 605 F g<sup>-1</sup> at current densities of 2, 4, 8, 12, 15, and 20 A g<sup>-1</sup> respectively, as shown in Figure S2d. The value of specific capacitance measured here is much lower than that of the chain-like NiCo<sub>2</sub>O<sub>4</sub> nanowires.

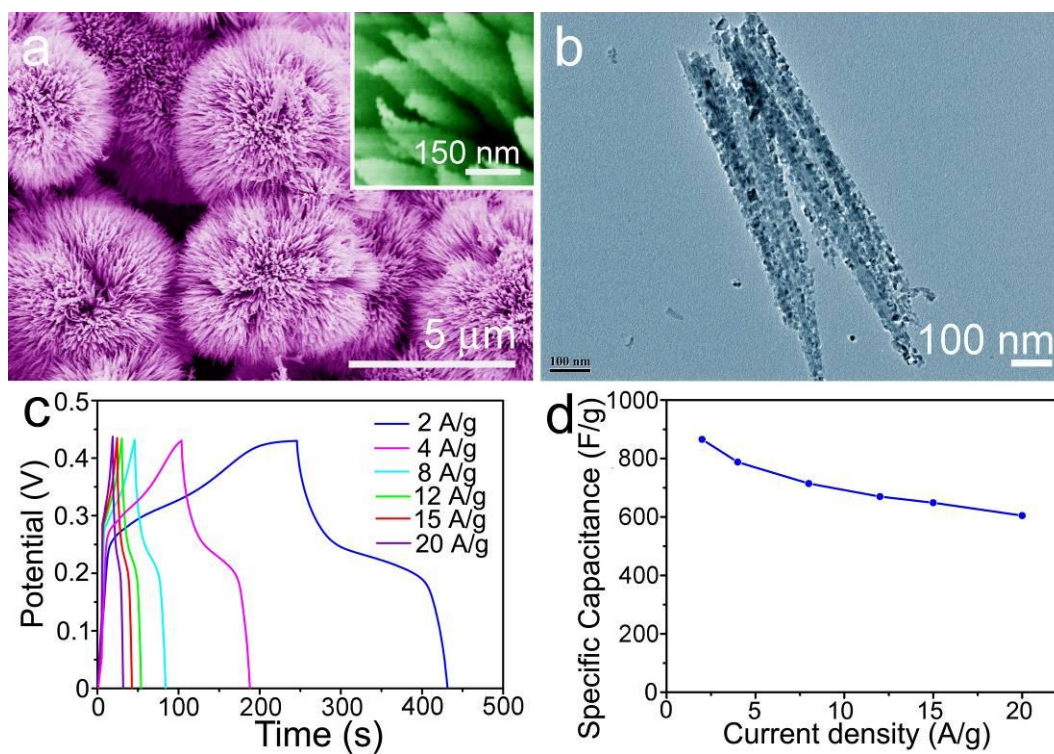

**Figure S2.** (a) SEM image of as synthesized  $\text{NiCo}_2\text{O}_4$  micro-spheres after calcinations; inset SEM image of mesopores  $\text{NiCo}_2\text{O}_4$  nanowires. (b) TEM images showing mesopores  $\text{NiCo}_2\text{O}_4$  nanowires after calcination. (c) CD curves of mesopores  $\text{NiCo}_2\text{O}_4$  nanowires at different current densities. (d) Specific capacitance of mesopores  $\text{NiCo}_2\text{O}_4$  nanowires at different current densities.

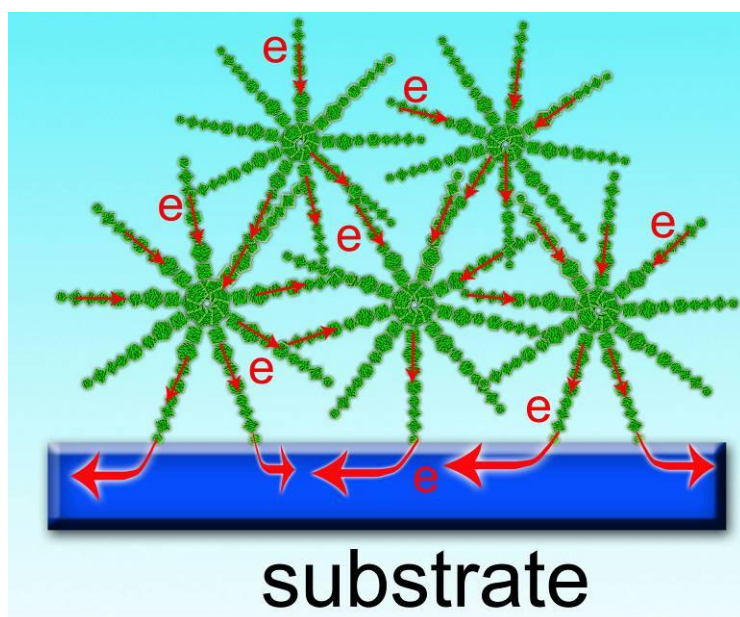

**Figure S3.** Schematic representation of the electron path on between chain-like  $\text{NiCo}_2\text{O}_4$  nanowires and chain-like  $\text{NiCo}_2\text{O}_4$  nanowires.
